# Supplementary material
Source: Springer Nature journal article supplement (https://www.springermedizin.de/resource/supplementary/12893_2012_434_MOESM4_ESM.pdf/9512108)
Supplement: MOESM4 [file 9512108]

**BOX Preventing near misses and incorrect surgery**

Systematic risk reducing efforts

- Hospital safety improvement programs
- Monitor and develop safety culture
- Chairs must report on and support safety efforts
- Build in clinical safety defences and barriers
- Surgical team training
- Implement perioperative checklists
